# Supplementary material for: Genome sequence of an Australian kangaroo, Macropus eugenii, provides insight into the evolution of mammalian reproduction and development
Source: PubMed Central journal article supplement (PMC3277949; doi:10.1186/gb-2011-12-8-r81), 2011-08-19

Platypus ultra362

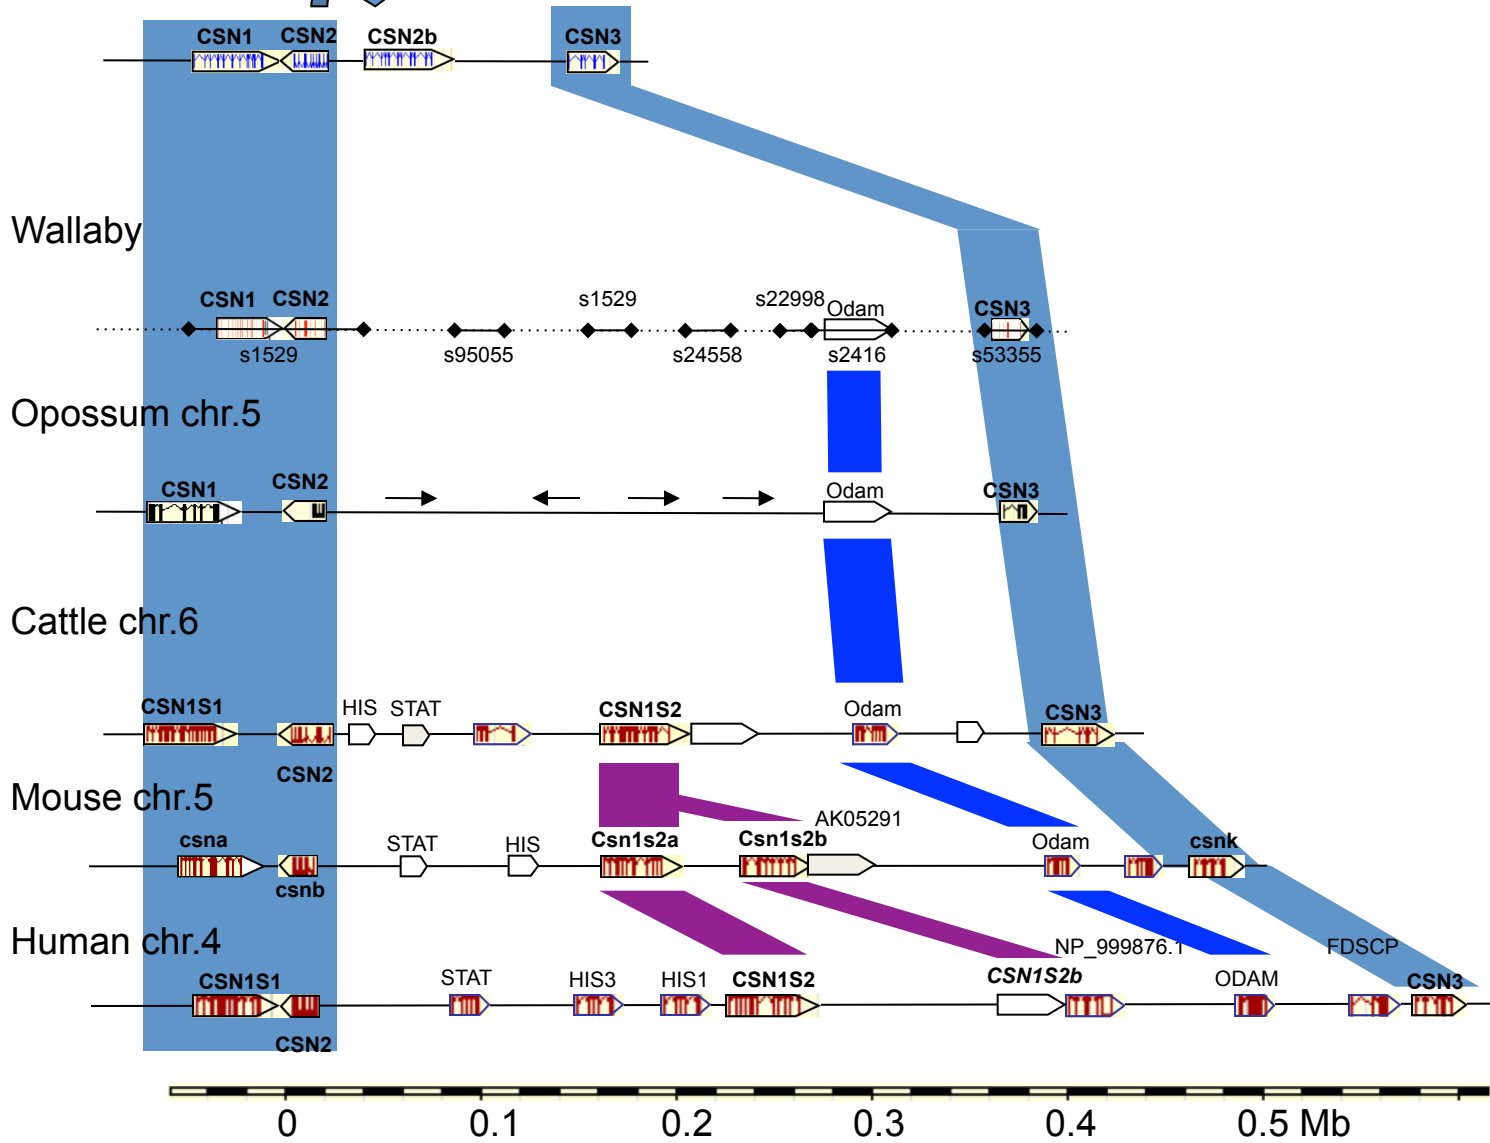

Supplement: gb-2011-12-8-r81-S4.pdf [file gb-2011-12-8-r81-S4.pdf]
