# Supplementary figures and images for: Genome sequence of an Australian kangaroo, Macropus eugenii, provides insight into the evolution of mammalian reproduction and development
Source: Springer Nature journal article supplement (doi:10.1186/gb-2011-12-8-r81), 2011-08-19

Million Years Ago

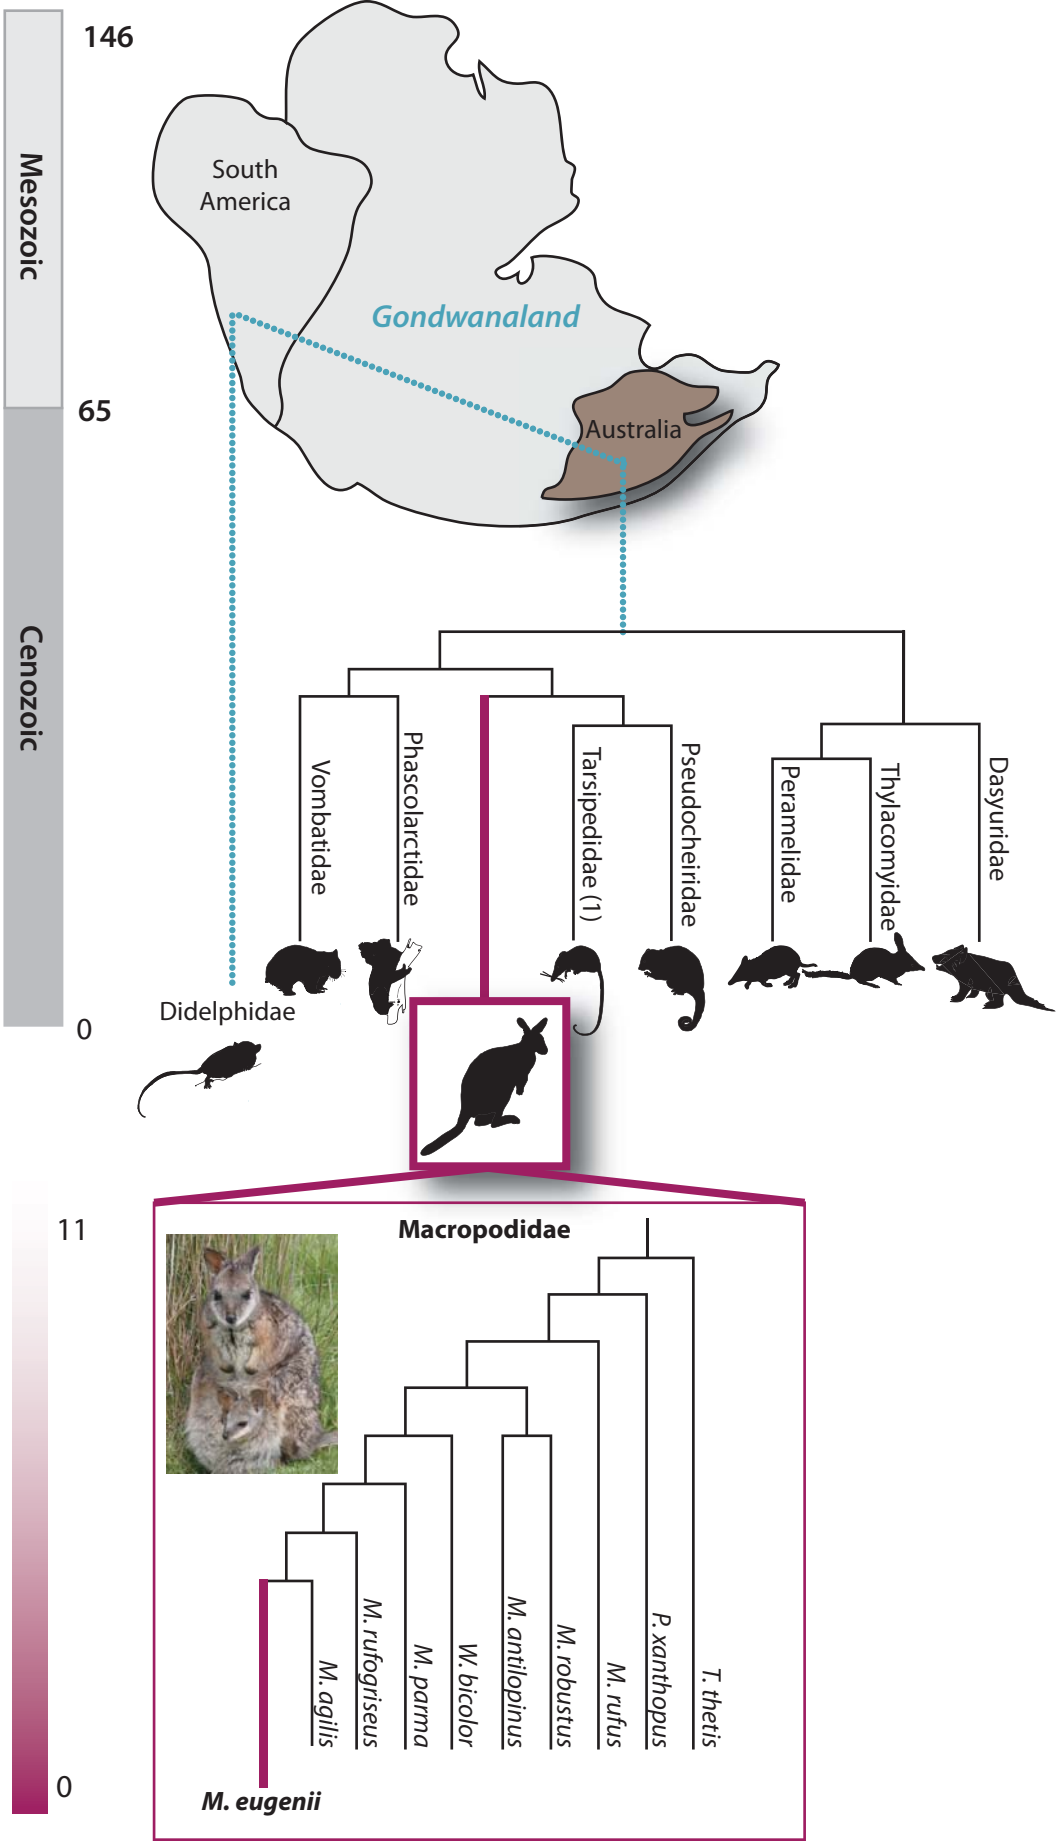

Supplement: 13059_2011_2659_MOESM5_ESM.pdf [file 13059_2011_2659_MOESM5_ESM.pdf]
